# Supplementary material for: Erg4 Is Involved in Ergosterol Biosynthesis, Conidiation and Stress Response in Penicillium expansum
Source: MDPI journal article supplement (doi:10.3390/jof9050568), 2023-05-13
Supplement: s1 [file s1]

## **Supplementary Materials**

**Supplementary Figure S1.** Construction of *erg4s* gene deletion mutants.

**Supplementary Figure S2.** PCR results of gene knockout mutants of *erg4s* in *P. expansum*. The amplification fragments of *erg4A*-up, *erg4B*-up, *erg4C*-up, *erg4A*-down, *erg4B*-down, *erg4C*-down from *P. expansum*, respectively (A). The PCR identification of  $\Delta erg4A$  (B),  $\Delta erg4B$  (C) and  $\Delta erg4C$  (D).

**Supplementary Table S1.** The primers used for the construction and identification of gene deletion mutants and complementation strains.

**Supplementary Table S2.** Primers used for RT-qPCR.

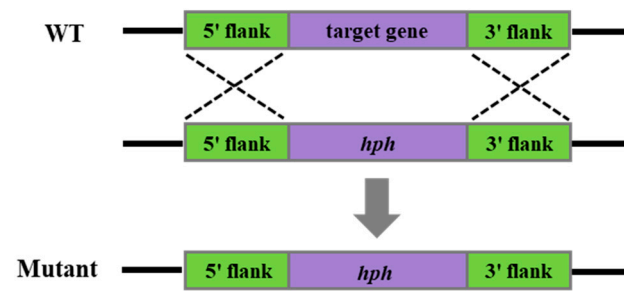

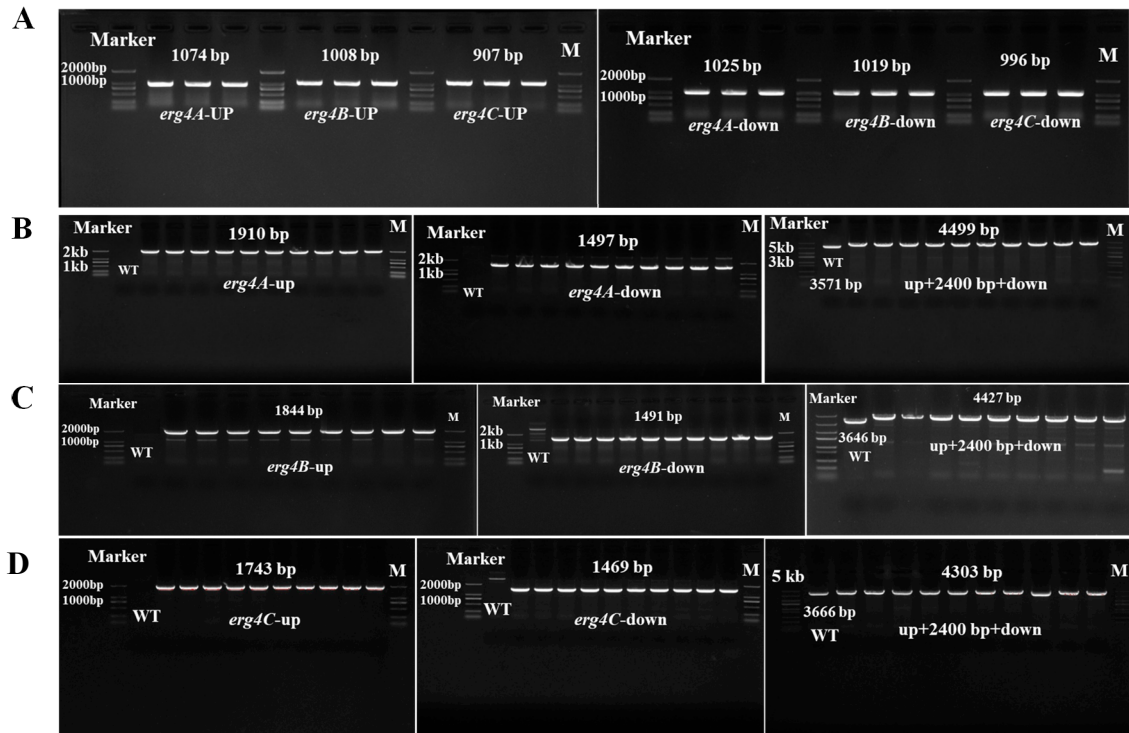

| Name                 | Primer sequence (5' - 3')                      |
|----------------------|------------------------------------------------|
| <i>erg4A</i> -up-F   | ACAGCTATGACCATGATTACGAATTCAGTAAACTCCTCCAACGAA  |
| <i>erg4A</i> -up-R   | GATCCCCGGGTACCGAGCTCGAATTCCTCACTCCTGGCAGTATGT  |
| <i>erg4A</i> -down-F | TTGCCTAACTCGGCGCGCCGAAGCTT GTTCAAGTTTGTTCGTCG  |
| <i>erg4A</i> -down-R | GTAAAACGACGGCCAGTGCCAAGCTTGAGGGCACCAATAATAAGA  |
| <i>erg4B</i> -up-F   | ACAGCTATGACCATGATTACGAATTC CGTCACGGTCACAAAGGA  |
| <i>erg4B</i> -up-R   | GATCCCCGGGTACCGAGCTC GAATTC CACTGGCTGCACGGATAT |
| <i>erg4B</i> -down-F | TTGCCTAACTCGGCGCGCCGAAGCTT AGGAGAAGTGCGAGAAGA  |
| <i>erg4B</i> -down-R | GTAAAACGACGGCCAGTGCCAAGCTT GACTAACCCGTCACCATT  |
| <i>erg4C</i> -up-F   | ACAGCTATGACCATGATTACGAATTC TTACCTTGCCAATCTTCC  |
| <i>erg4C</i> -up-R   | GATCCCCGGGTACCGAGCTC GAATTC GACCACCATTGAGCCATA |
| <i>erg4C</i> -down-F | TTGCCTAACTCGGCGCGCCGAAGCTT CTCAATGAAGCCGGGACG  |
| <i>erg4C</i> -down-R | GTAAAACGACGGCCAGTGCCAAGCTT AGCCTCGATGTTTGTTCG  |
| <i>TrpC</i> -F       | TAGAGTAGATGCCGACCGG                            |
| <i>OliC</i> -R       | CTGAAAGCACGAGATTCTTC                           |
| <i>erg4A</i> -F      | TCAACTCCATCACATCACAAGAGCTCATGGAGGACCAAGTCAAATC |
| <i>erg4A</i> -R      | AGCTCCTCGCCCTTGCTCACTCTAGAAAAAGAGAAATTGCAGTAG  |
| <i>erg4B</i> -F      | TCAACTCCATCACATCACAAGAGCTCATGCCCTCCAAAAAGGACTC |
| <i>erg4B</i> -R      | AGCTCCTCGCCCTTGCTCACTCTAGAGTAAATTCCAGGAATGATGC |
| <i>erg4C</i> -F      | GCATGGACGAGCTGTACAAGGAGCTCATGGATCGTCCCGGCTTCAT |
| <i>erg4C</i> -R      | ATGGAGCTATTAAATCACTATCTAGATTAGAAGACATACTATAGGA |
| CX1                  | GGAGA CGTAT TTAGGTGCTA                         |
| CX2                  | TGAACTTCA GGGTCAGCTT                           |
| <i>erg4A</i> -GFP-F  | ATGGAGGACCAAGTCAAATC                           |
| <i>erg4A</i> -GFP-R  | AAAAAGAGAA ATTGCAGTAG                          |
| <i>erg4B</i> -GFP-F  | ATGCCCTCCAAAAAGGACTC                           |
| <i>erg4B</i> -GFP-R  | GTAAATTCCA GGAATGATGC                          |
| <i>erg4C</i> -GFP-F  | ATGGATCGTC CCGGCTTCAT                          |
| <i>erg4C</i> -GFP-R  | TTAGAAGACA TAAGGAATGA                          |

| Name                | Primer sequence (5' - 3') |
|---------------------|---------------------------|
| <i>erg4A</i> -F     | TCCACGAATGTTTCGGAATCC     |
| <i>erg4A</i> -R     | AGCTCAAACCCAAGAGCATGA     |
| <i>erg4B</i> -F     | CGGCGCTTTATGATACCAATG     |
| <i>erg4B</i> -R     | GGGAAGGAAGACCTGCAAAAA     |
| <i>erg4C</i> -F     | GCATTCCCATCAATCAAAGCA     |
| <i>erg4C</i> -R     | CCGGGAAGAAGCACGTAACA      |
| <i>β-tubulin</i> -F | CTCCAGCTCGAGCGTATGAAC     |
| <i>β-tubulin</i> -R | GGCTCCAAATCGACGAGAAC      |
